# Supplementary figures and images for: A simple single-source precursor route to the nanostructures of AlN, GaN and InN
Source: Royal Society of Chemistry journal article supplement (doi:10.1039/b502887f), 2005-01-01

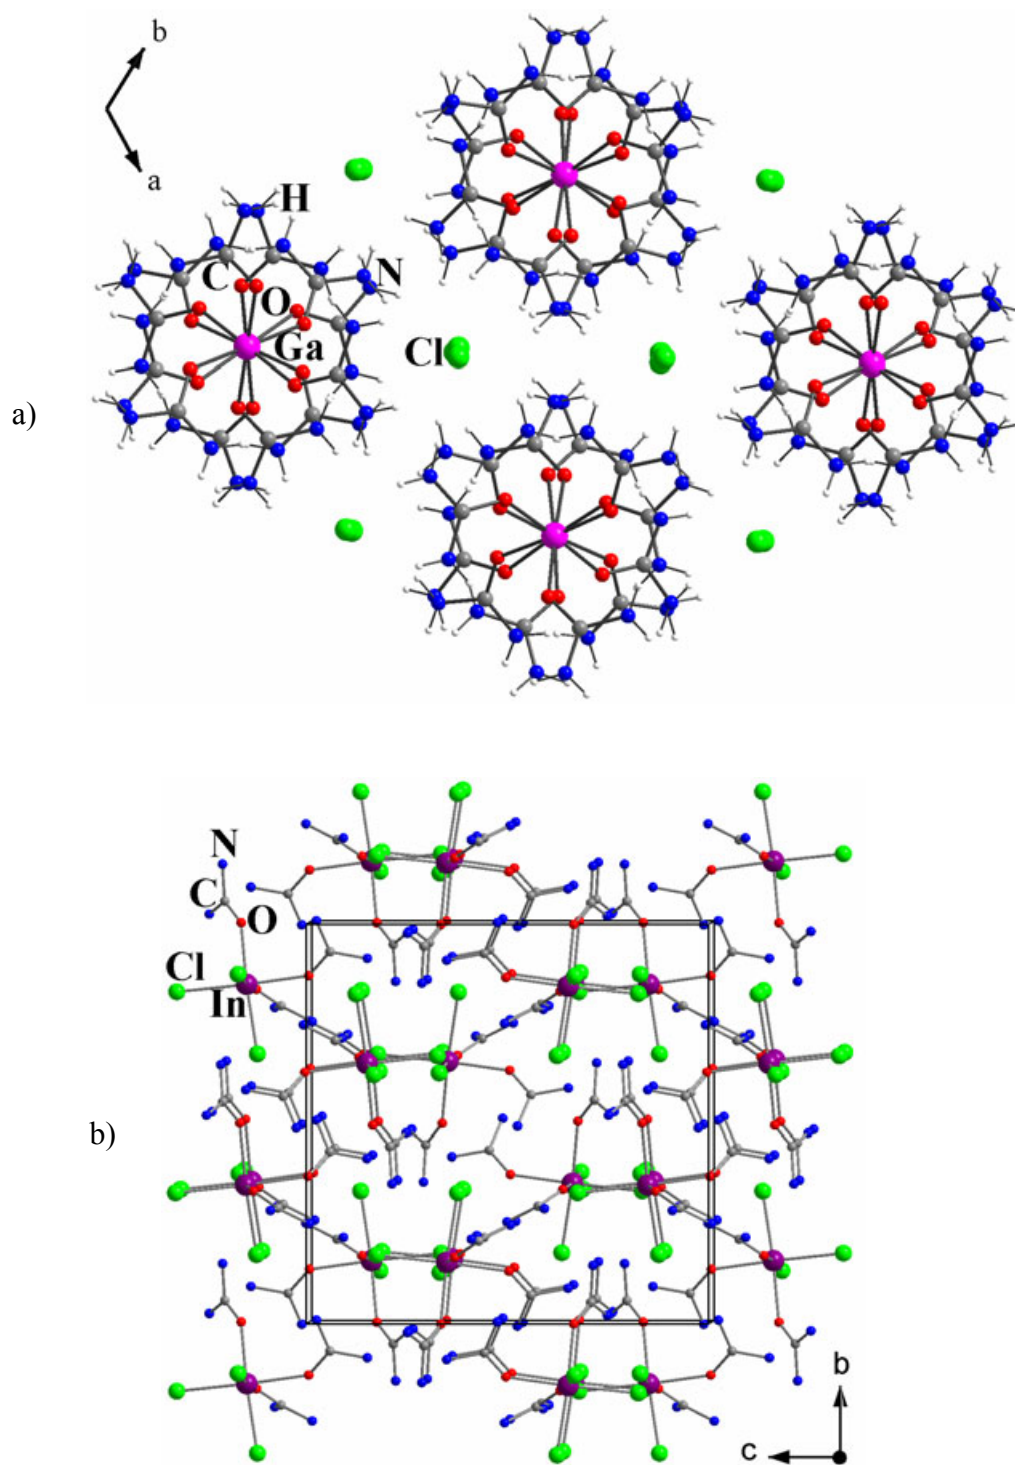

Figure 1

Supplement: b502887f.pdf [file b502887f.pdf]
